# Supplementary material for: Adopting Innovation across an NHS Ecosystem in the East of England- a realist evaluation
Source: Research Square preprint supplement (doi:10.21203/rs.3.rs-5504858/v1), 2025-03-12
Supplement: Supplementary file 1 [file 6e75061e00899eb2496c2052.docx]

| **Context**  **Supplementary File S1: CMOCs Summary Table** | **Mechanisms** | **Outcomes** | **Evidence** |
| --- | --- | --- | --- |
| **Innovation Hub culture, structure and efficacy** | **Clear vision and strategy** (co created and implemented with stakeholders)  **Innovation Leadership and Resources**   - Strong Innovation Leadership - (Lack of) Staff expertise, capacity and [[1]](#footnote-1)resources - Continuity planning - Ability to flex and adapt to change   **Provides technical and project management support**   - developing project proposals for funding - helping to secure funding - creating a milestone tracker - providing ongoing project management support - supporting information sharing agreement development - reporting to NHSE, - leading contract extension negotiations   **Manages networks and relationships**   - managing relationships with providers and evaluators - introduce new innovators to relevant support networks to help manage their innovations’ progress. - Aligns the work with wider commercial partnerships   **Funds innovation projects**   - ability to catalyse innovation projects with small amounts of funding investment through co-ordination and support of innovation bids - robust framework to assess, review, and approve funding - finding solutions and alternative strategies to help projects be successful   **Evidences impact** in and on practice/services   - Timely impact evaluation | **Macro**   - Channelled innovation resources to the local area in line with local priorities - Local innovation projects resourced and funded to address health inequalities - Building sustainable relationships , partnerships and networks across innovation partners - Built the foundations for the Hub to be integrated into the ICS creating system wide architecture for innovation | **R2 P12**  **R2 P17**  **R2 P19**  **R2 P20**  **R2 P25**  **R2 P26**  **R2 P27**  **R2 P32**  **R3 P14**  **R3 P15**  **R3 P27**  **R3 P28** |

| **Context** | **Mechanisms** | **Outcomes** | **Evidence** |
| --- | --- | --- | --- |
| **System Innovation Governance** | Strong consensus and commitment to strategy and vision  Key governance arrangements in place providing clarity of expectations and decision making processes  Building connections and buy in across the ICS footprint  Standardised systematic innovation processes  Clear signposting and decision making processes  Shared regional language for talking about innovation adoption  Ability to flex and adapt to changing contexts and challenges  Shared learning and insight into existing innovation assets, models, methods and resources  Shared experiences of different types of innovation adoption to broaden understanding  Identification of existing strengths and challenges together. | **Micro**   - Easier for people to access resources and expertise   **Macro**   - More effective and efficient collaboration - Single front door for innovation to access resources and experience - Reduced duplication - Removed barriers to innovation adoption - Innovation is scaled system wide for maximum impact - Population health improvement | **R1 P23**  **R3 P6**  **R3 P10**  **R3 P11**  **R3 P12**  **R3 P13**  **R3 P17** |

| **Context** | **Mechanisms** | **Outcomes** | **Evidence** |
| --- | --- | --- | --- |
| **System Strategic Leadership** | Leadership concordat in place  Direction setting, creating the buy in from the top, shaping the focus for innovation activity  Clear operational and strategic oversight  Re Hub efficacy and core activities  Integral vehicle of support and encouragement to the Hub  Recognition and willingness to find solutions to enable all parts of the system to fully engage | **Meso**   - Strong working relationships - Effective strategic steer for innovation activity   **Macro**   - Work of the Hub is embedded in the ICS through system wide innovation infrastructure - Innovation momentum and impact sustained - Public and system interest in innovation is peaked | **R1 P23**  **R2 P54**  **R3 P11**  **R3 P12**  **R3 P13**  **R3 19**  **R3 P20**  **R3 P22** |
| **System convening and conduit for effective communication** | Having an inclusive collaborative approach  Convening partners-Getting the right people around the table to facilitate effective system communication  Encouraging cross-organisational collaboration (partners with Healthwatch and in between Trusts).  Enabling people to navigate around an innovation system  Clear communication channels to facilitate feedback  Commitment from partners with expertise in a range of complementary approaches (innovation, improvement, evaluation co production)  Provide mechanisms to initiate wider conversations with the public  Having one system wide conversation about innovation | **Macro**   - Effective system wide communication and knowledge sharing about iEffective system wide relationships which overcome the barriers to implementation - New ways of working - Stakeholders and the public are well informed about innovation opportunities - System wide navigation for innovation | **R1 P23**  **R2 P15**  **R3 P14**  **R3 P28**  **R3 P29**  **R3 P32**  **R3 P33**  **R3 P35** |
| **Citizen participation and co-production is embedded** | Collaborative inclusive approach involving citizens in healthcare innovation decision making  Effective model for co-design and tangible processes in place for public involvement  Citizen voice influences Hub governance, structures and processes  Role clarity in innovation selection and the work of the Hub  Shared learning experiences  Staff developing key skills in co design methodology | **Micro**   - Citizens feel their voice is valued, heard and included - Greater citizen confidence and satisfaction - No one is left behind - Sense of pride in the innovation impact   **Macro**   - Health inequalities addressed focused on what matters to people - Solutions co designed with patients and citizens according to their health interests - New innovations benefit from public involvement and insight - Avoidance of duplication of effort in innovation - Innovation is better understood by staff and the public | **R2 P15**  **R3 P13**  **R3 P14**  **R3 P26**  **R3 P27**  **R3 P29**  **R3 P32** |
| **Building and sustaining an innovation culture and pipeline** | Facilitating culture change and understanding the role of context in innovation adoption   - Cultivating an appetite for innovation adoption - Getting more people inspired and talking about innovation - Addressing people’s varied understanding of the definition of innovation culture - Investing in measurement, evaluation and shared learning   Modelling opportunistic risk-taking and positive disruption  Supporting coordination of implementation projects through innovation champions/link workers  **Offering shared learning events and resources:**   - Online workshops - Webinars - Innovation Showcase event - educational resources - workshops with commercial and system partners development of a portfolio approach for managing innovation pipelines   **Selecting and Resourcing Innovation**   - Aligned with ICB strategic priorities and relative to primordial, primary, secondary, and tertiary health prevention. - Modelling a joint approach for innovation selection across the ICB - Help the system make decisions about resource allocation so that those organisations that do not have sufficient resources are not left behind   **Identifying barriers to innovation** –   - financial pressures, - clinician engagement, - workforce and workload issues, - visibility and - duplication of effort - address the areas where innovation does not happen as easily   **Maintaining system visibility** with clear signposting to an innovation pipeline | **Micro/Meso**   - More people know what innovation is and how to access help with their innovations - Teams are more innovative and adaptable - Staff satisfaction   **Macro**   - The wider system is ready to adopt innovation - Effective system wide innovation pipeline and communication - System improvements in the adoption and spread of innovation/greater efficiencies in services and patient outcomes | **R1 P10-12**  **R1 P15**  **R1 P22**  **R1 P23**  **R2 P18**  **R2 P25**  **R2 P27**  **R2 P36**  **R2 P54**  **R3 P23**  **R3 P33**  **R3 P30**  **R2 P34**  **R3 P18 R3 P20**  **R3 P24** |

1. R refers to the formative evaluation report that this theme was derived from in the main analysis [↑](#footnote-ref-1)
